# Supplementary material for: Acropora digitifera Encodes the Largest Known Family of Fluorescent Proteins that Has Persisted during the Evolution of Acropora Species
Source: PubMed Central journal article supplement — Genome Biol Evol. 2016 Nov 9;8(11):3271–83. doi: 10.1093/gbe/evw265 (PMC5203795; doi:10.1093/gbe/evw265), 2016-11-09
Supplement: supp_evw265_Supp_figs.pdf [file supp_evw265_Supp_figs.pdf]

# Supporting Figure S1.

(A)

AdiFP2

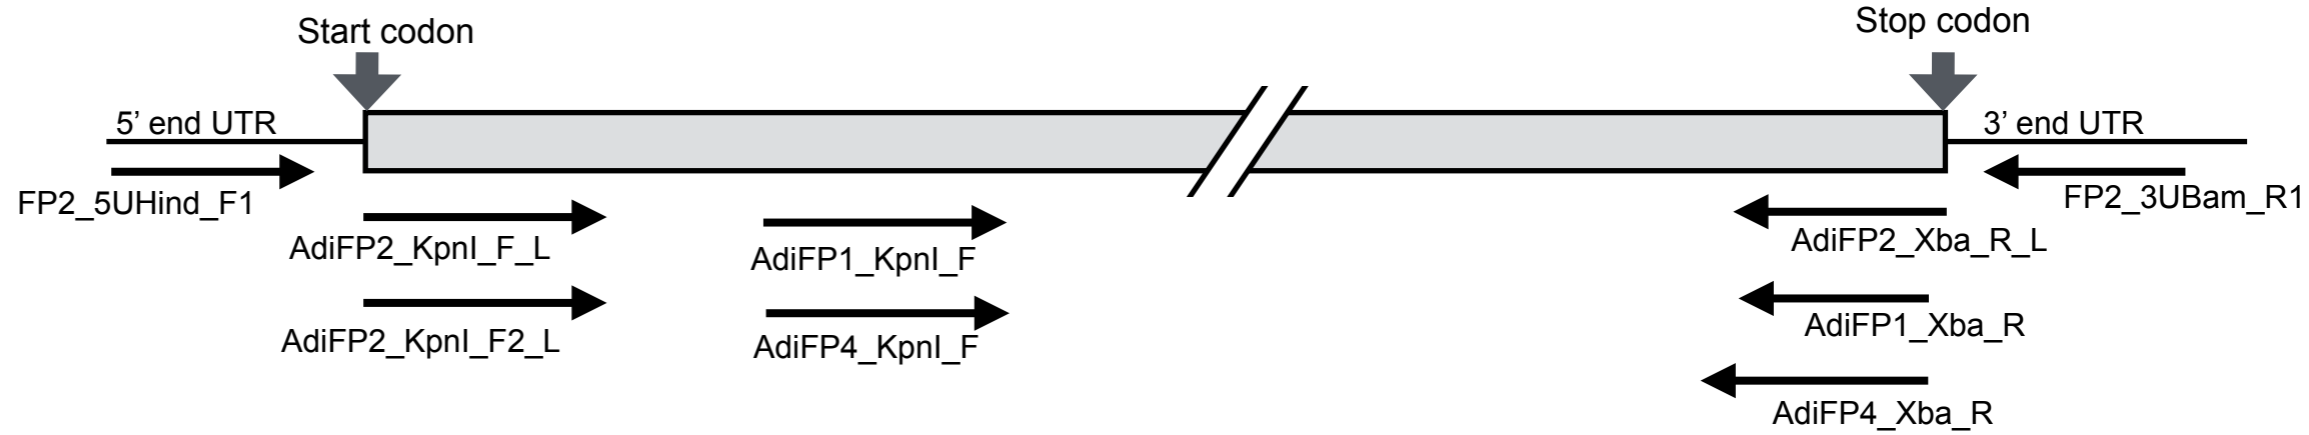

AdiFP10L

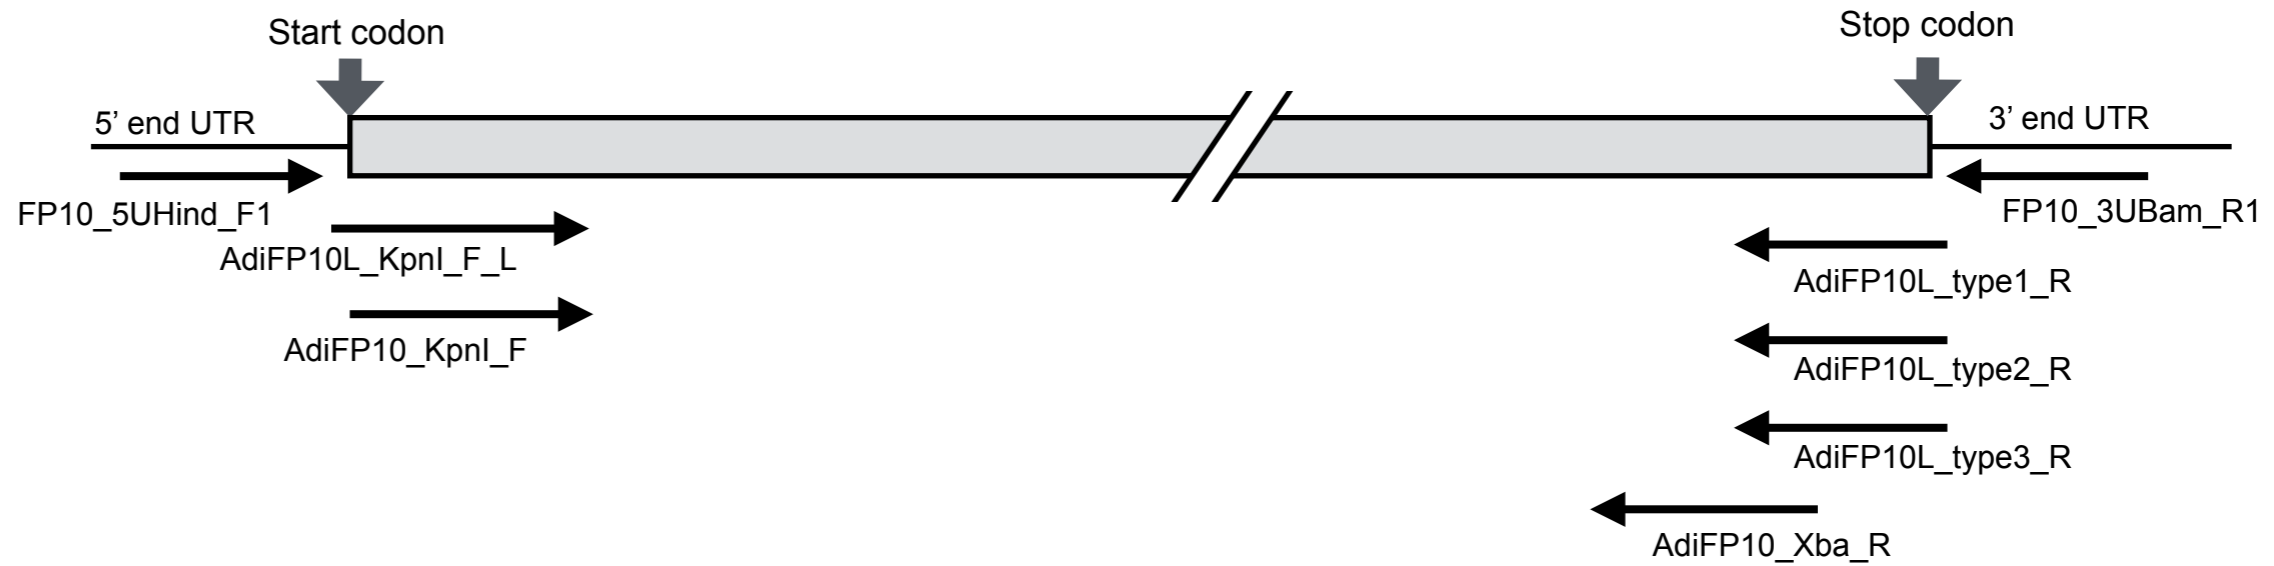

AdiFP8L

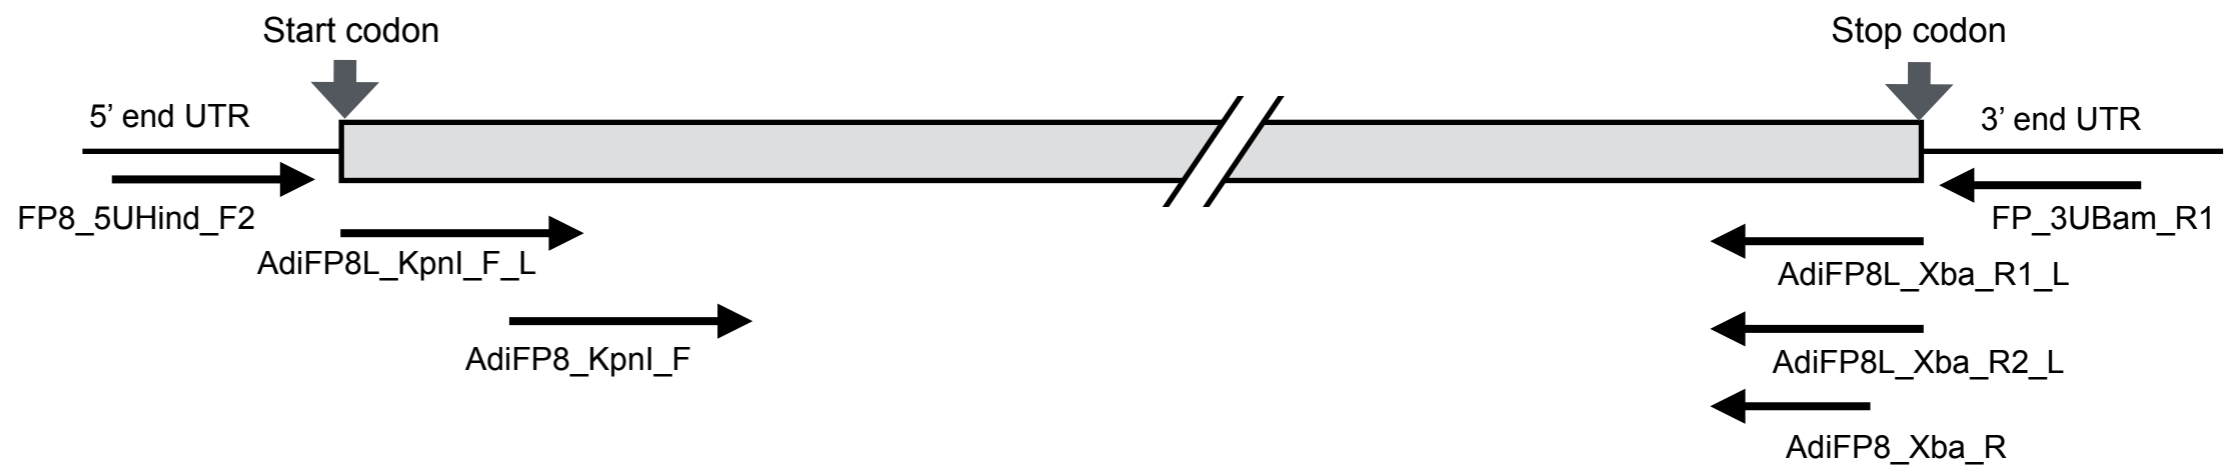

# Supporting Fig. S1 continued

(B)

| Name of primers  | Sequence of primers                             |
|------------------|-------------------------------------------------|
| FP2_5UHind_F1    | 5'-CACACAAAGCTTGACRGAGTGAACTRCCGTRAACAG-3'      |
| FP2_3UBam_R1     | 5'-CACACAGGATCCGTAAGTATTGAAAGTGCTTCCATC-3'      |
| FP10_5UHind_F1   | 5'-CACACAAAGCTTGCARGAGAGTTACTHGASTTTTGTATCAC-3' |
| FP10_3UBam_R1    | 5'-CACACAGGATCCCAGAGWAATAAGCATGCGCATGTAAC-3'    |
| FP8_5U_F2        | 5'-TCTCTTTCACGGAAGGAGCTACTTAA-3'                |
| FP8_5U_R1        | 5'-GTYTACACTTCTTCGTTCTACTTC-3'                  |
| AdiFP1KpnI_F     | 5'-CAGGTACCATGAAGACAAAATACCATATGG-3'            |
| AdiFP1XbaI_R     | 5'-TGTCTAGATTATTGAACCATCAAAGGGTTA-3'            |
| AdiFP2KpnI_F     | 5'-AGGTACCATGTCTTATTCAAAGCAAGGCAT-3'            |
| AdiFP2XbaI_R     | 5'-TGTCTAGATTATTTAACCTTCAAAGGGTTA-3'            |
| AdiFP4KpnI_F     | 5'-CAGGTACCATGCGGACGAAAATACCATATG-3'            |
| AdiFP4XbaI_R     | 5'-TGTCTAGATTAACTTCAAAGGATTAACATGAG-3'          |
| AdiFP10KpnI_F    | 5'-CAGGTACCATGGAAGGGTCTGTGCGATGG-3'             |
| AdiFP10XbaI_R    | 5'-TGTCTAGAGGAAGCAACAGCATGTTCTAC-3'             |
| AdiFP8KpnI_F     | 5'-AGGTACCATGACCTACAAGGTTTATATGTC-3'            |
| AdiFP8XbaI_R     | 5'-TGTCTAGATCAGGCGACCCACAGGTTTGC-3'             |
| AdiFP2KpnI_F_L   | 5'-CACACAGGTACCATGTCTTATTCAAAGCAAGGCAT-3'       |
| AdiFP2KpnI_F2_L  | 5'-CACACAGGTACCATGTCTCATTCAAAGCAAGGCAT-3'       |
| AdiFP2XbaI_R_L   | 5'-TGTGTGTCTAGATTATTTAACCTTCAAAGGGTTA-3'        |
| AdiFP10L_KpnIF_L | 5'-CACACAGGTACCATGGCTCTGTCAAAGCACGGTCTA-3'      |
| AdiFP10L_type1_R | 5'-TGTGTGTCTAGATTATCCGGGCAATGCGGATC-3'          |
| AdiFP10L_type2_R | 5'-TGTGTGTCTAGATTATCAGGCCAATGCGGATC-3'          |
| AdiFP10L_type3_R | 5'-TGTGTGTCTAGATTATCAGGGCAATGCGGATC-3'          |
| AdiFP8L_KpnIF_L  | 5'-CACACAGGTACCATGAGTGTGATCGCTAA-3'             |
| AdiFP8XbaI_R1_L  | 5'-TGTGTGTCTAGATCAGGCGACCCACAGGTTTGC-3'         |
| AdiFP8XbaI_R2_L  | 5'-TGTGTGTCTAGATCAGGCGACCACAAGTTTGC-3'          |
| MWE_qPCR_F3      | 5'-TGACTATTCAAGCAAGCATTCCCAGATG-3'              |
| MWE_qPCR_R1      | 5'-CGAATGTTCCAGCTGGCTGTAGC-3'                   |
| MLWE_qPCR_F3     | 5'-TTTCCTGCTGATGGACCTGTGATGA-3'                 |
| MLWE_qPCR_R1     | 5'-CCACCATCCTTCAGAAGGAGGTAC-3'                  |
| CP_qPCR_F1       | 5'-CAGTACGGAAGCATACCATTACCAAGTA-3'              |
| MiA_CP_e3_R1     | 5'-TGGATGCTGGAATCATTGCTGACAGTACAC-3'            |
| EF1a-qPCR_F1     | 5'-CTGTCTTGATTGTGGCTGCTGGAA-3'                  |
| EF1a-qPCR_R1     | 5'-GCTTTACTCCTAGGGTGTAAAGCCAACA-3'              |

Supporting Fig. S2

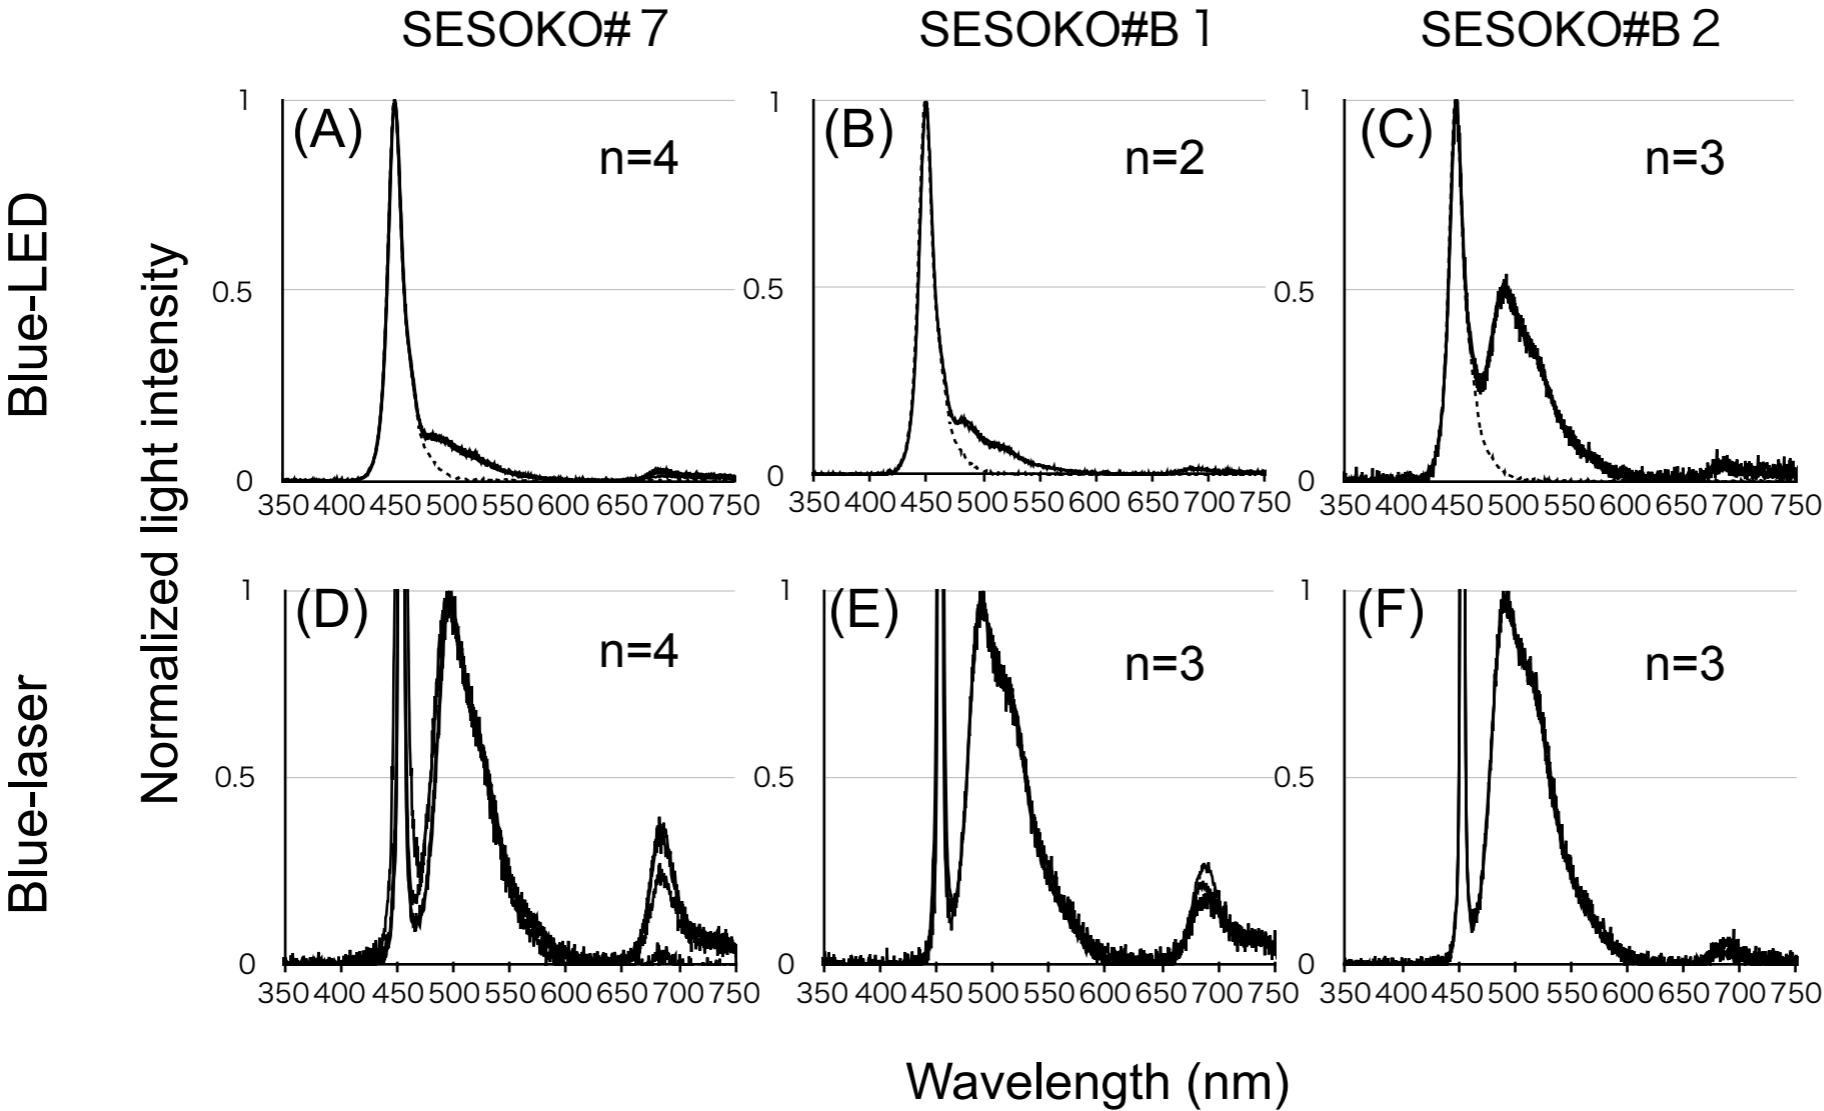

# Supporting Fig. S3

|                   |                                                                       |
|-------------------|-----------------------------------------------------------------------|
| amiLGFP(AY646067) | <b>ATG</b> TCTTATTCAAAGCAAGGCATCGTACAAGAAATGAAGACGAAATACCATATGGAAGGC  |
| AdiFP2 (BR000963) | <b>ATG</b> TCTTATTCAAAGCAAGGCATCGTACAAGAAATGAAGACGAAATACCATATGGAAGGC  |
| amiLRFP(AY646073) | <b>ATG</b> GCTCTGTCAAAGCACGGTTTAAACAAAGGACATGACGATGAAATACCACATGGAAGGG |
| AdiFP10(BR000970) | -----ATGGAAGGG                                                        |
| AdiFP10L          | <b>ATG</b> GCTCTGTCAAAGCACGGTCTAACAAAGGACATGACGATGAAATACCGGATGGAAGGG  |
| amiLCP (AY646075) | ----- <b>ATG</b> AGTGTGATCGCTAAACAAATGACCTACAAGGTTTATATGTCAGGC        |
| AdiFP8 (AB698751) | -----ATGACCTACAAGGTTTATATGTCAGGC                                      |
| AdiFP8L           | ----- <b>ATG</b> AGTGTGATCGCTAAACAAATGACCTACAAGGTTTATATGTCAGGC        |

# Supporting Fig. S4

(A)

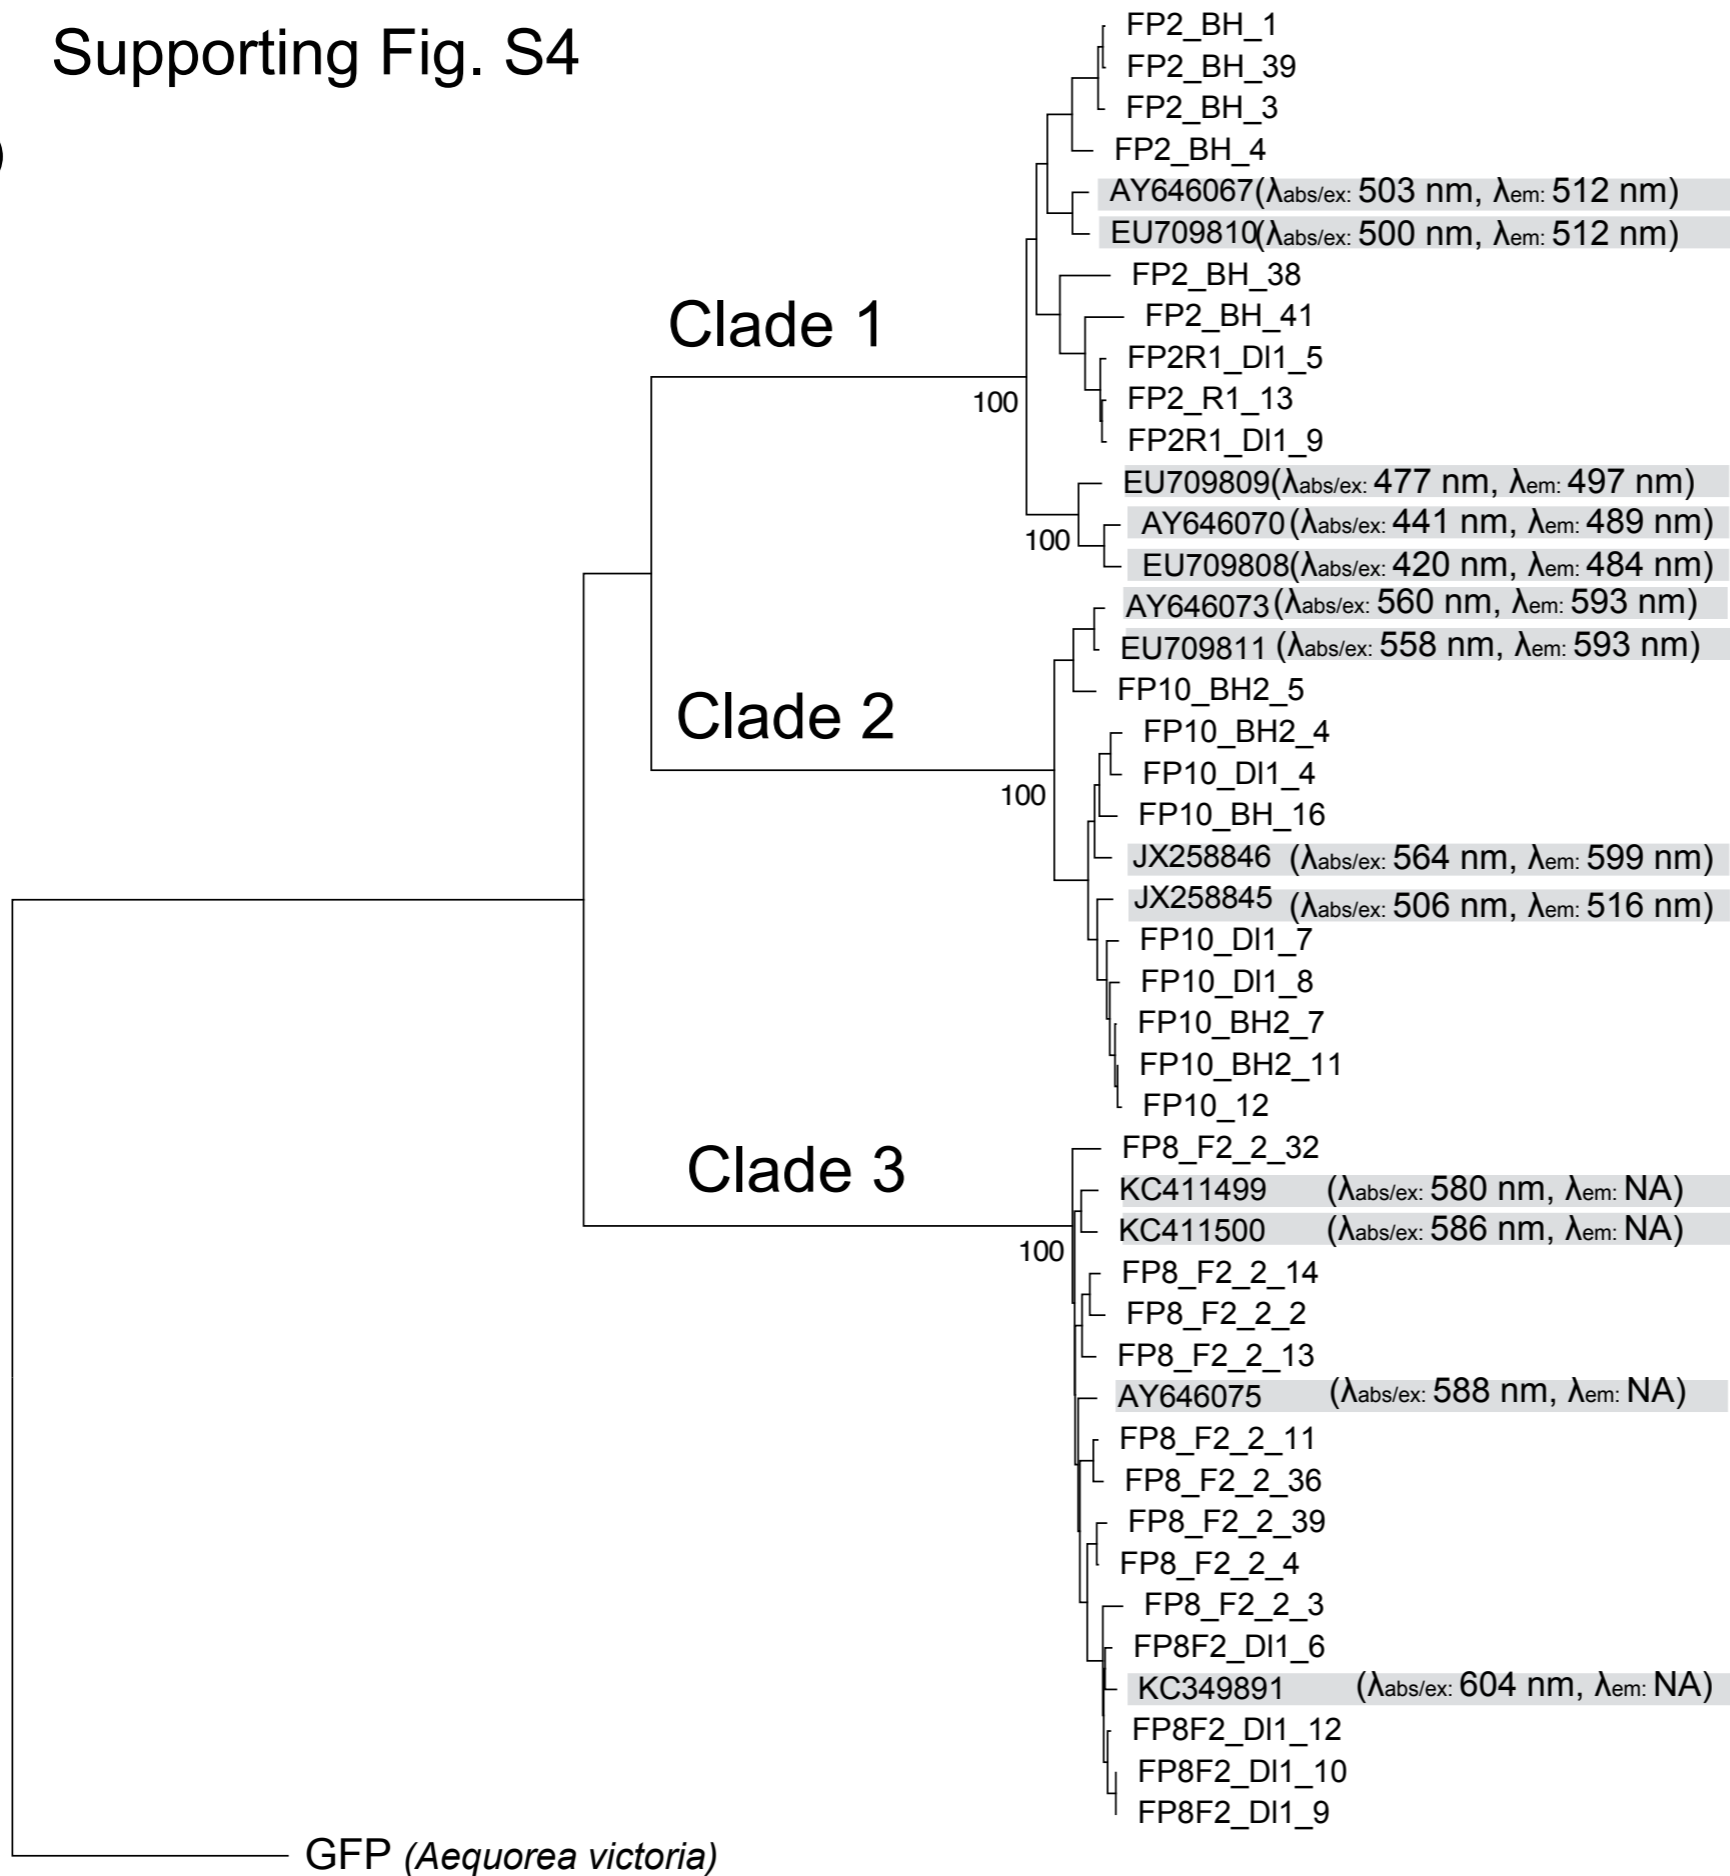

0.05

# Supporting Fig. S4 continued

(B)

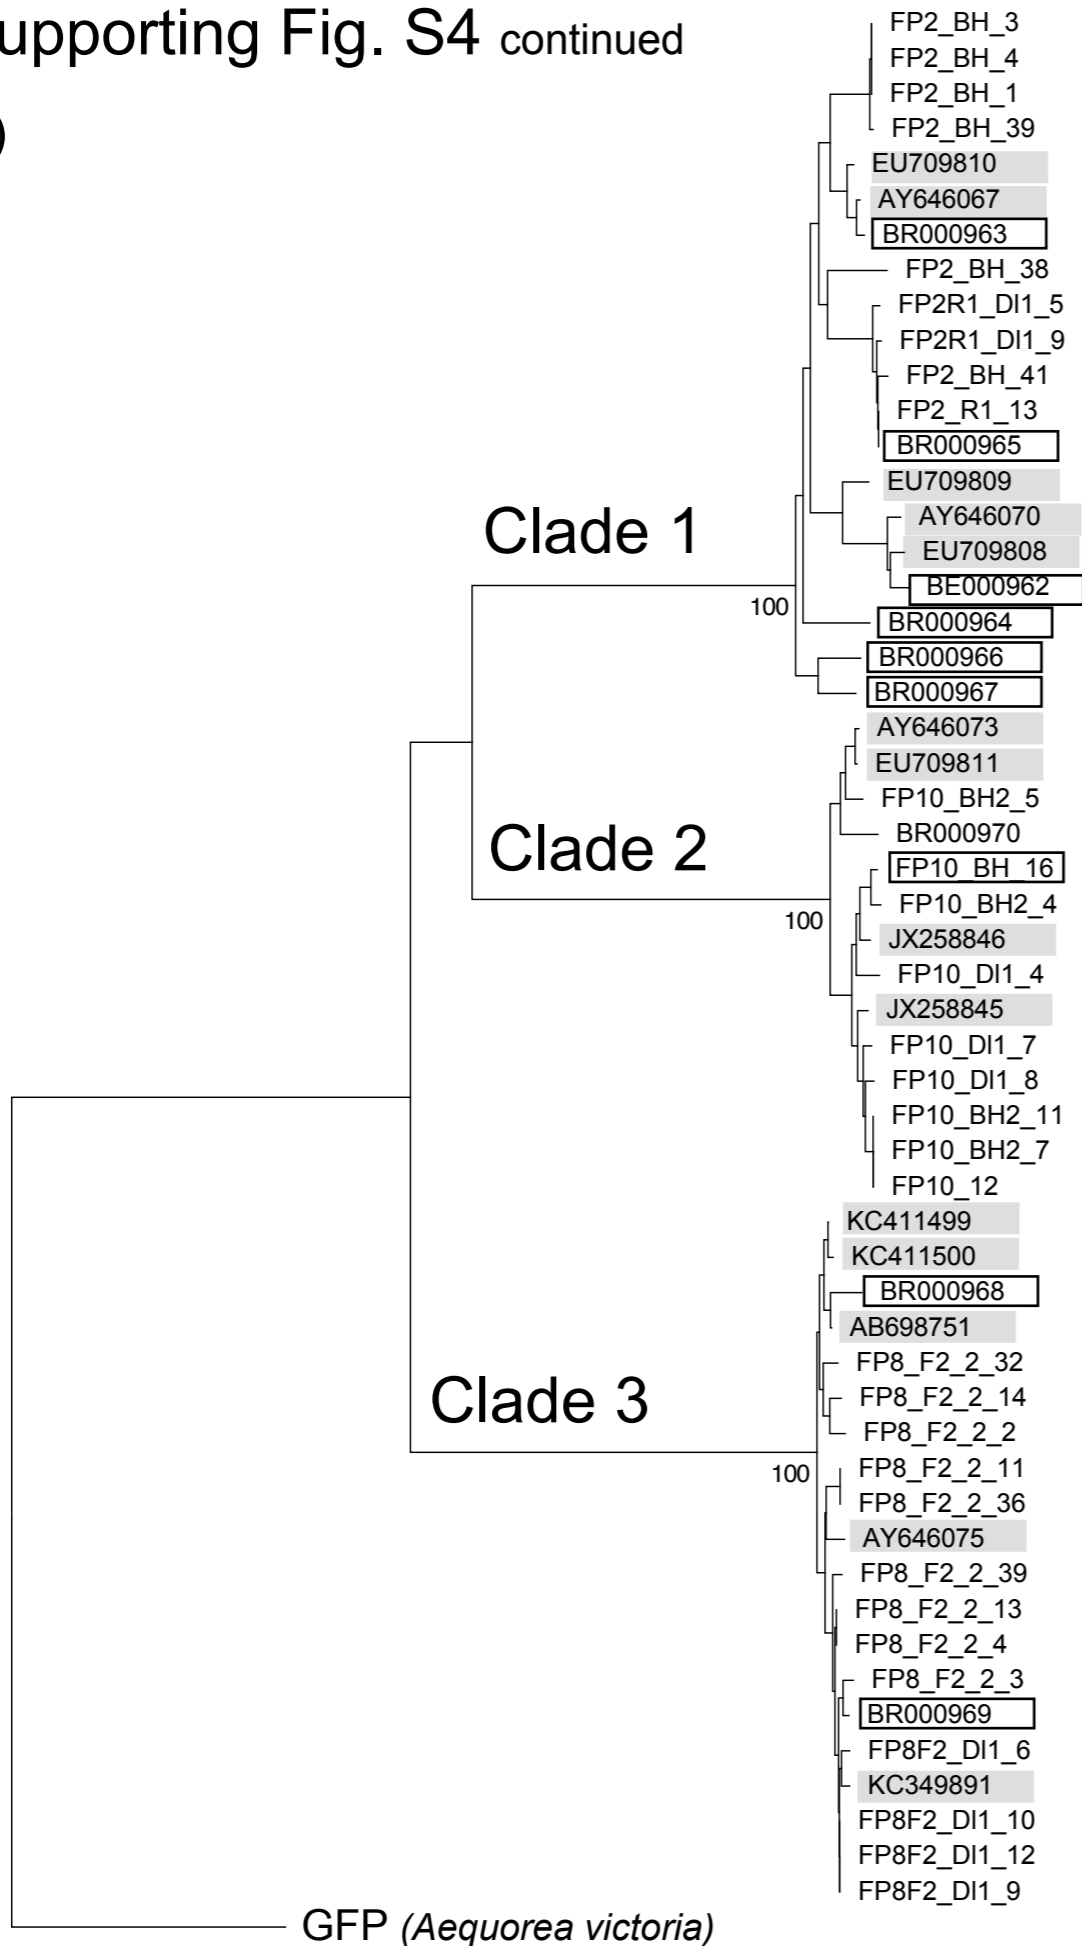

# Supporting Fig. S4 continued

(C)

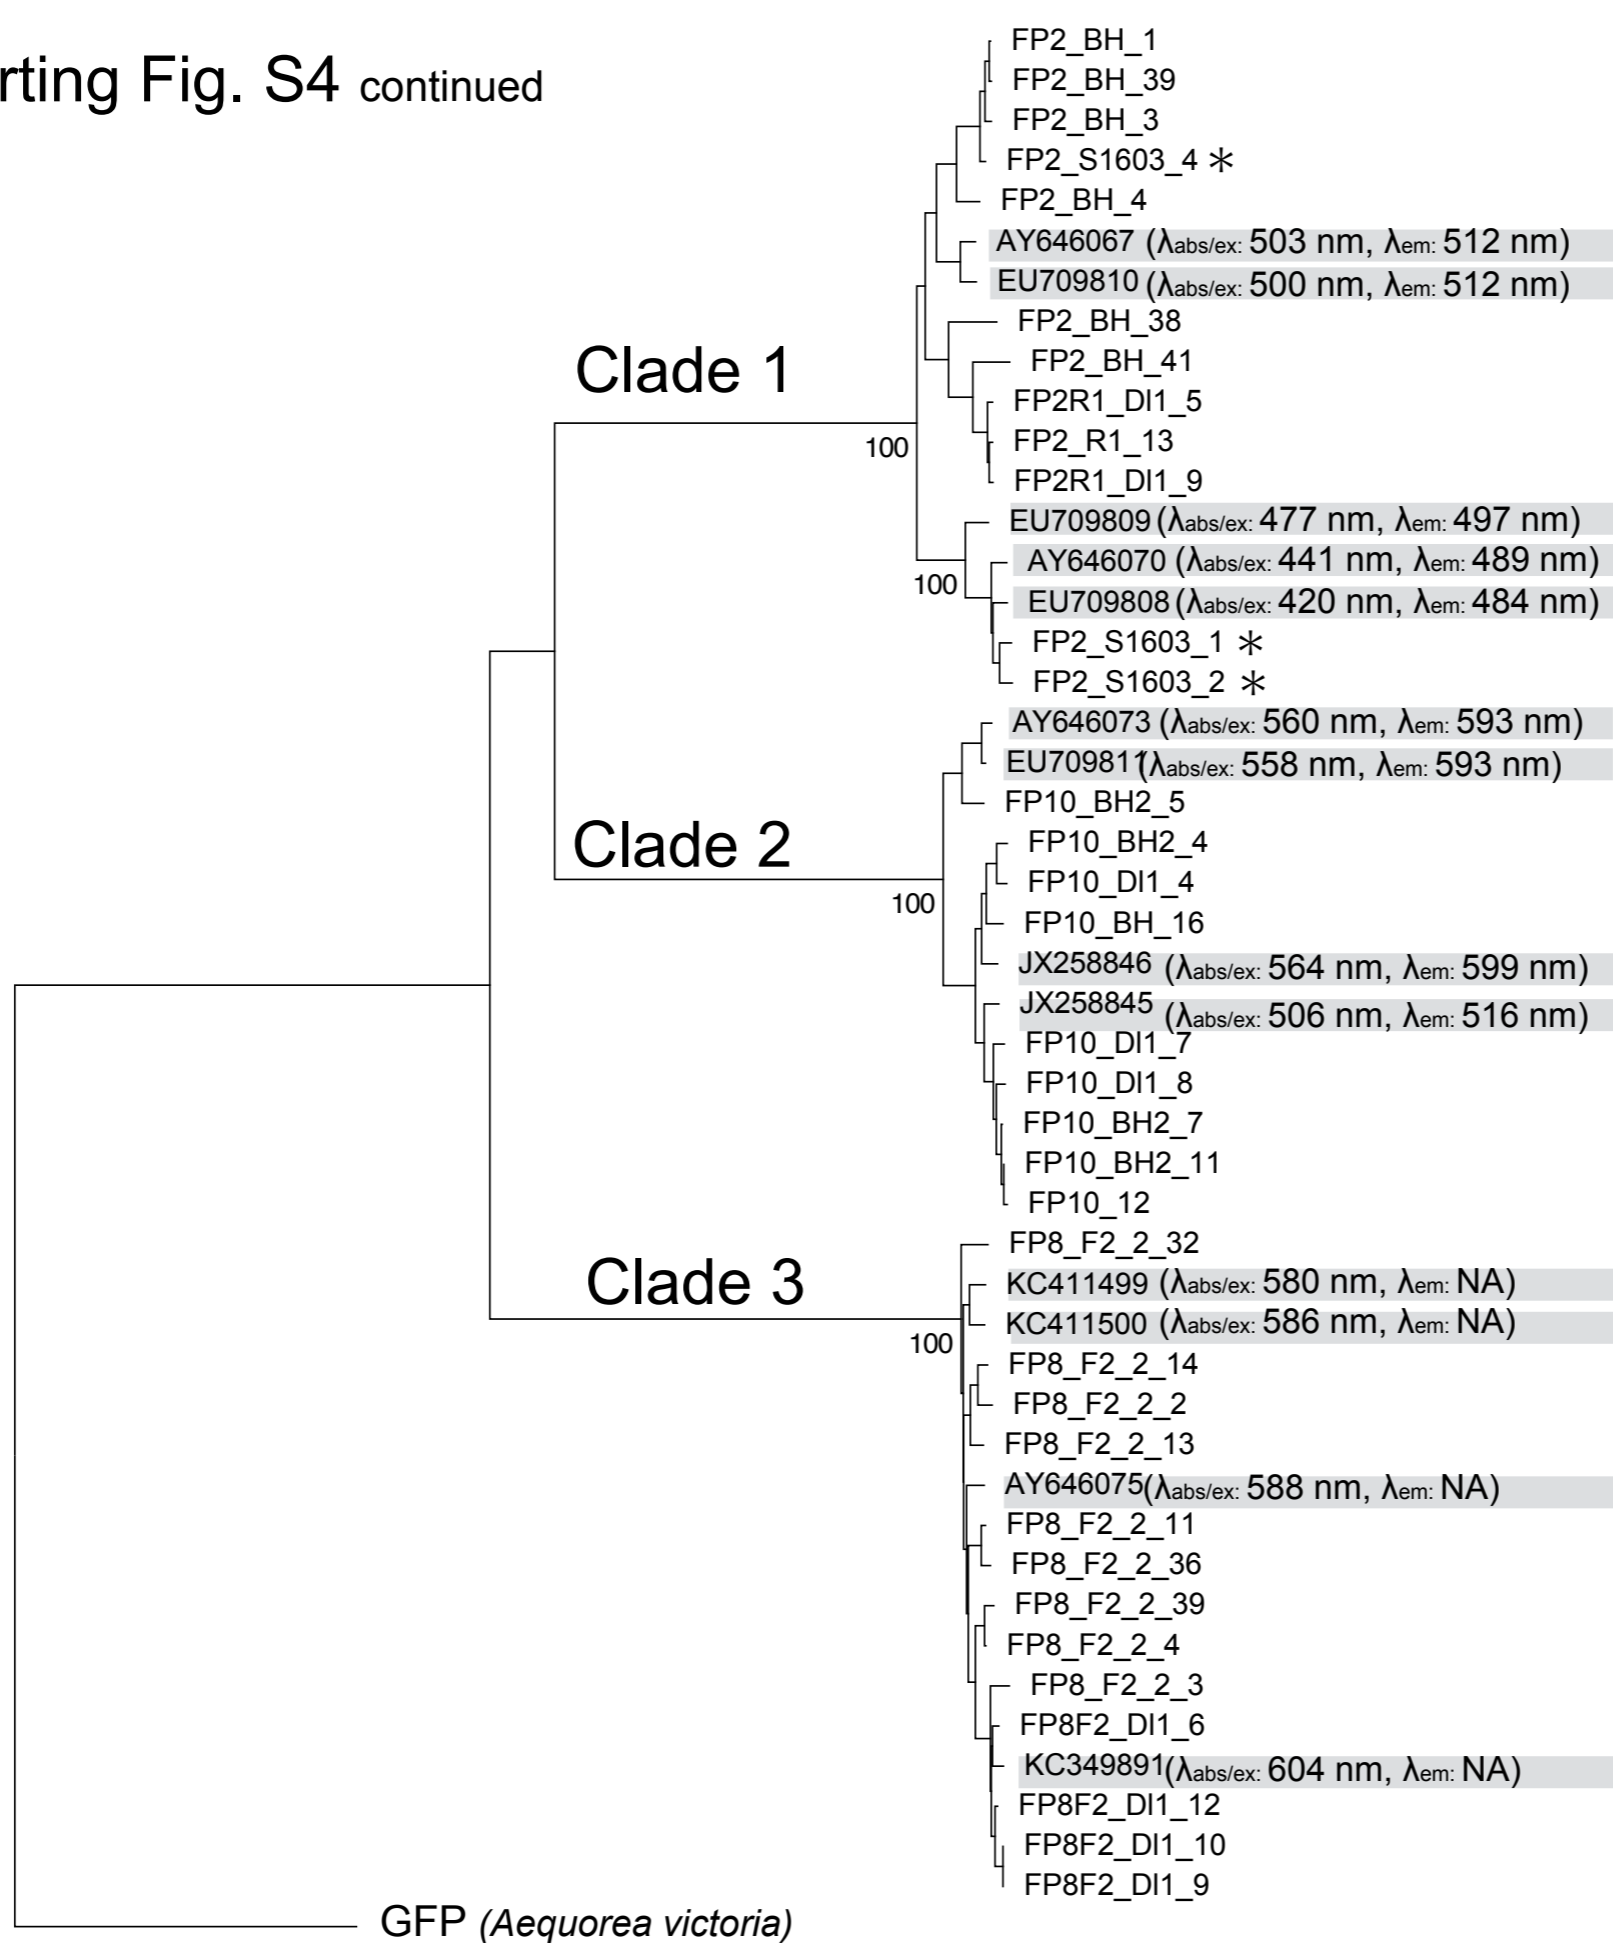

# Supporting Fig. S5

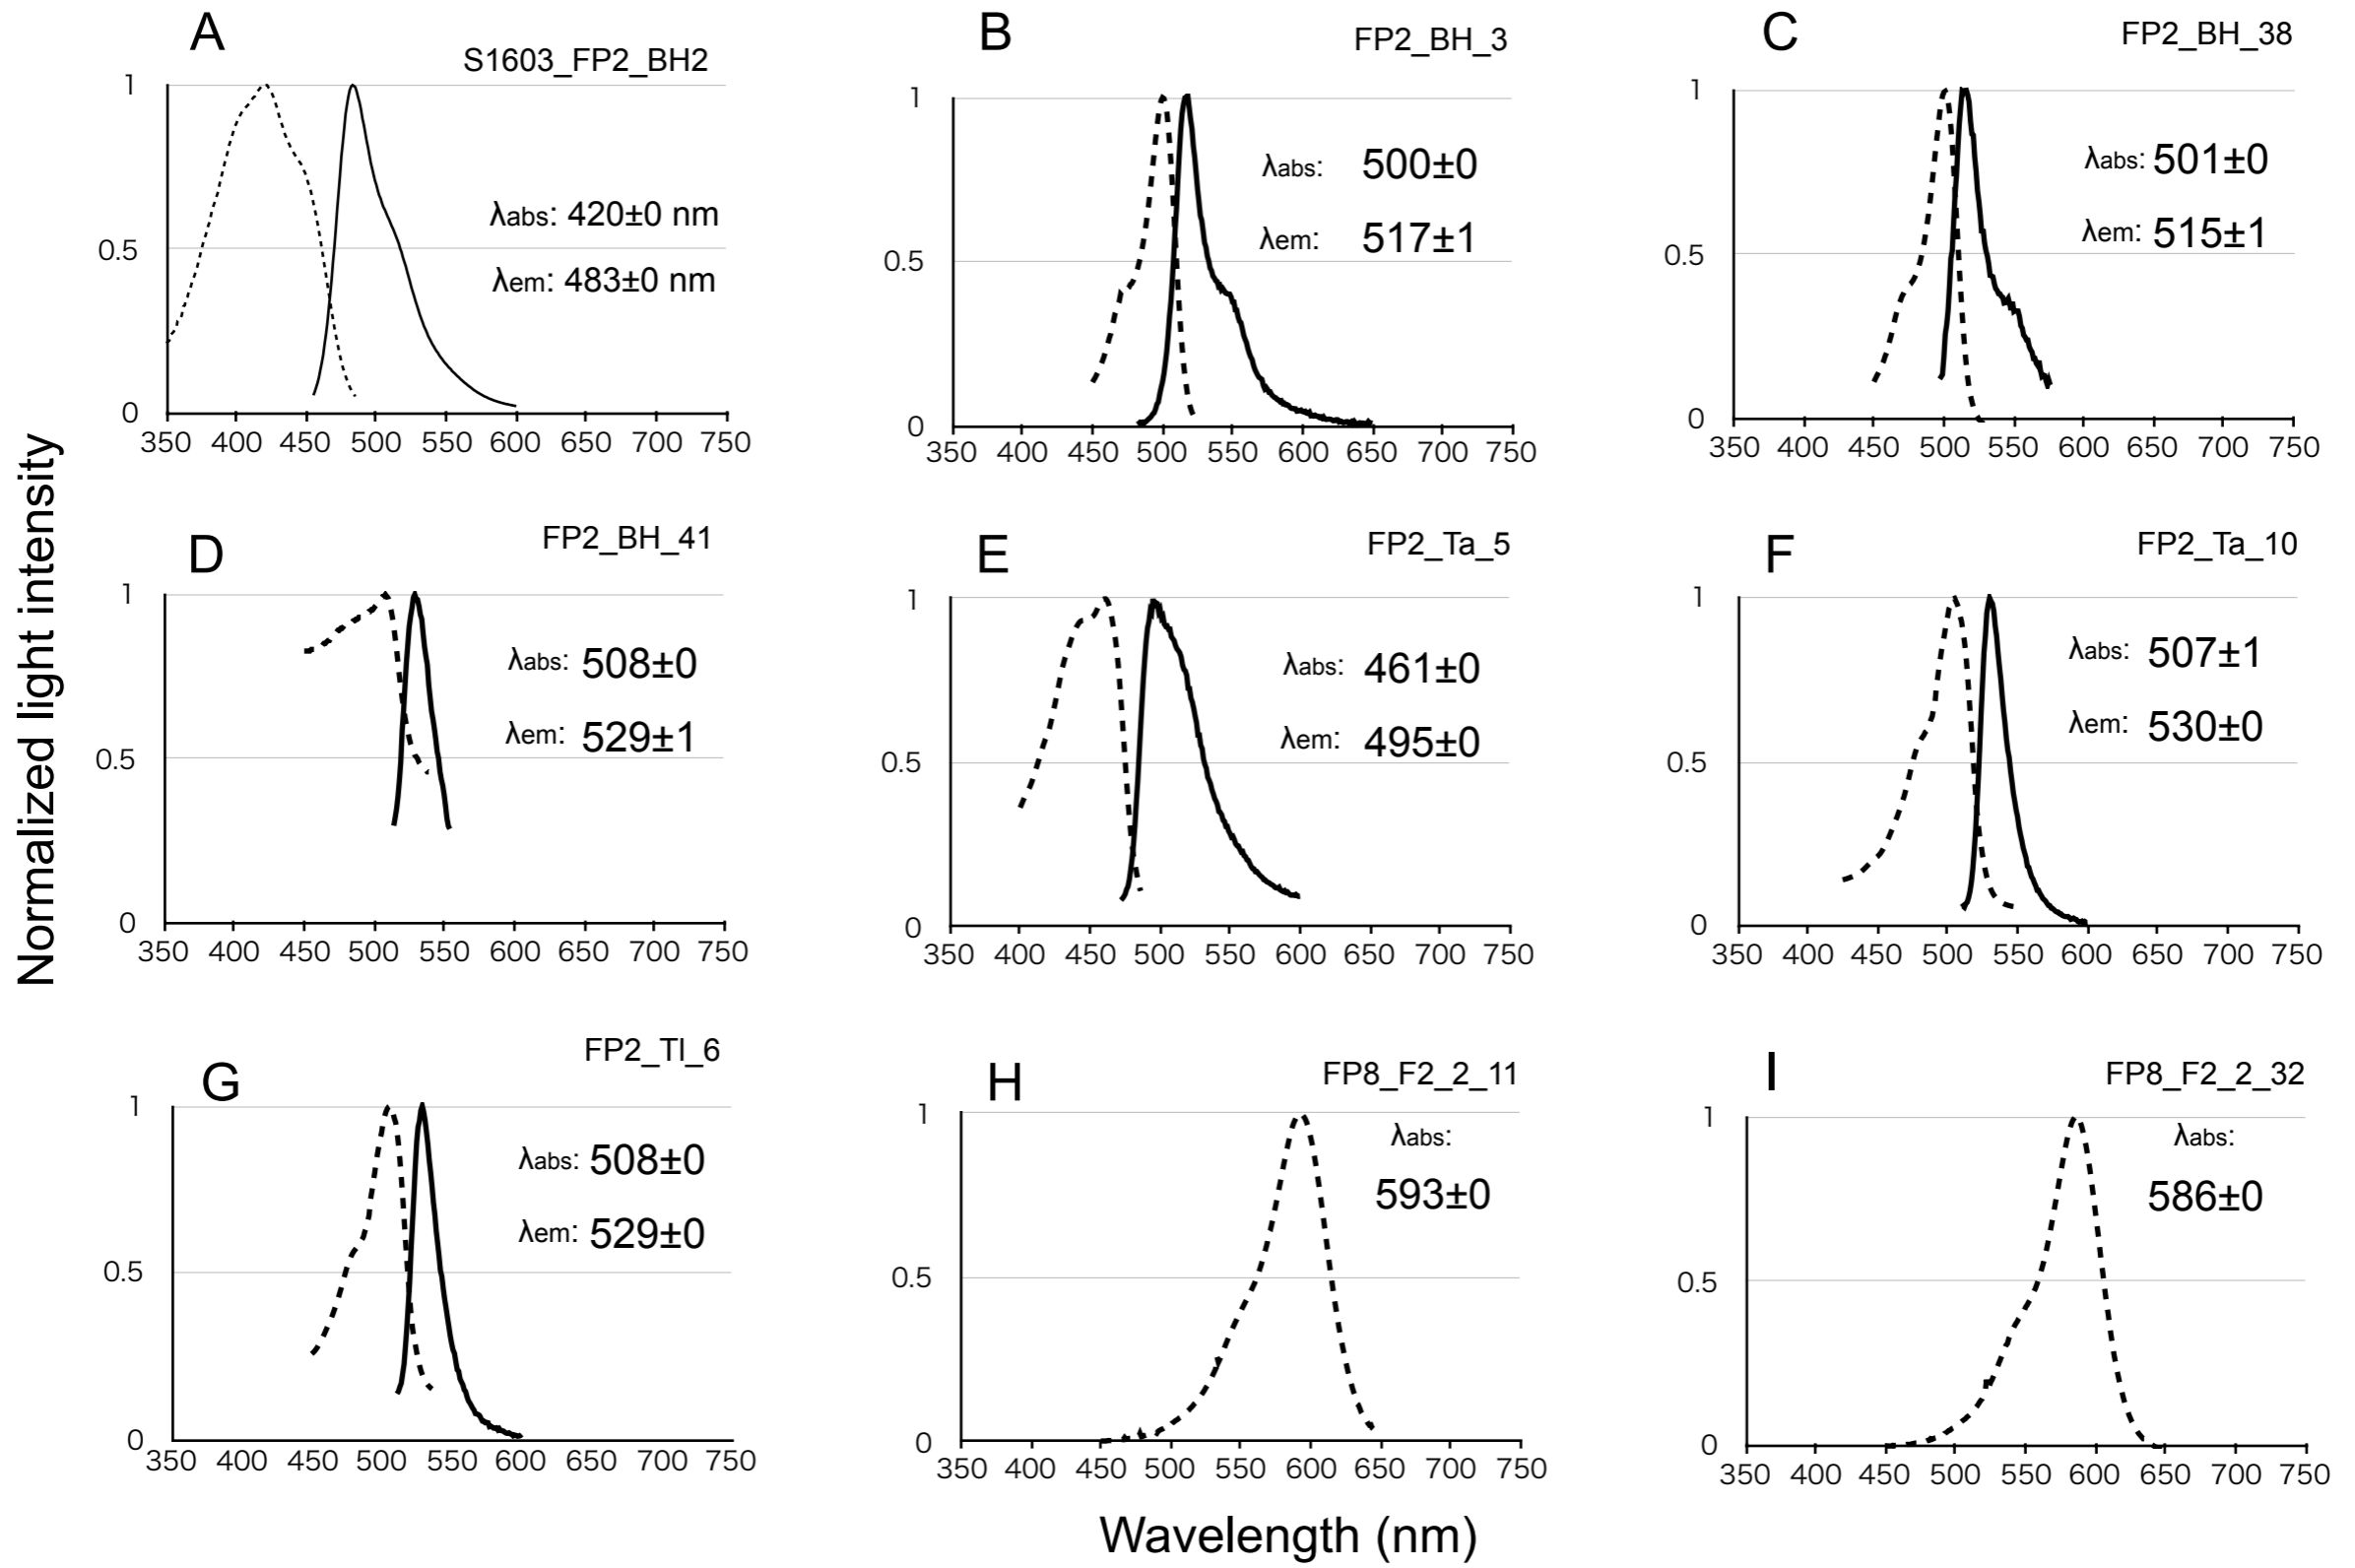





# Supporting Fig. S6 continued

(B)

|            |            |            |            |            |            |            |            |            |            |            |            |            |            |
|------------|------------|------------|------------|------------|------------|------------|------------|------------|------------|------------|------------|------------|------------|
| Nucleotide | 1          | 1111111112 | 2222222223 | 3333333334 | 4444444445 | 5555555556 | 6666666667 | 7777777778 | 8888888889 | 9999999990 | 0000000001 | 1111111111 | 1111111111 |
| site       | 1234567890 | 1234567890 | 1234567890 | 1234567890 | 1234567890 | 1234567890 | 1234567890 | 1234567890 | 1234567890 | 1234567890 | 1234567890 | 1234567890 | 1234567890 |
| amilRFP    | MALSKHGLTK | DMTMKYHMEG | SVDGHKQVIT | GHGNGNPFEG | KQTMNLCVVE | GGPLPFSEDI | LSAAFDYGNR | VFTEYPQGMV | DFKNSCPAG  | YTWHRSLLE  | DGAVCTTSAD | ITVSVEENCF |            |
| FP10_BH2_4 | .....      | .....R...  | C.....     | .....S.... | ...I.....  | .....      | ...V.....  | ...D.....  | .....      | ...Q.....  | .....A...  | .....      | .....      |
| FP10_12    | .....      | .....R...  | C.....     | .....S.... | ...I.....  | .....      | ...V.T.... | .....      | .....      | ...Q.....  | .....A...  | .....      | .....      |

  

|            |            |            |            |            |            |            |            |            |            |            |            |            |     |
|------------|------------|------------|------------|------------|------------|------------|------------|------------|------------|------------|------------|------------|-----|
| Nucleotide | 1111111111 | 1111111111 | 1111111111 | 1111111111 | 1111111111 | 1111111111 | 1111111111 | 1111111112 | 2222222222 | 2222222222 | 2222222222 | 2222222222 | 222 |
| Site       | 1234567890 | 1234567890 | 1234567890 | 1234567890 | 1234567890 | 1234567890 | 1234567890 | 1234567890 | 1234567890 | 1234567890 | 1234567890 | 1234567890 | 123 |
| amilRFP    | YHNSKFHGVN | FPADGPVMKK | MTTNWEPSCE | KIIPVPRQGI | LKGDIAMYLL | LKDGGRYRCQ | FDTIYKAKSD | PKEMPEWHFI | QHKLTREDRS | DAKNQKWQLV | EHAVASRSAL | PG*        |     |
| FP10_BH2_4 | ..E.....   | .....      | .....C..   | .....      | ...V.....  | .....      | ...V....T. | ..K.....   | .....      | .....A     | ..S.....   | ..*        |     |
| FP10_12    | ..E.....   | .....      | .....C..   | .....      | ...V.....  | .....      | ..SV....T. | S.K.....   | .....      | .....A     | ..S.....   | A*         |     |

(C)

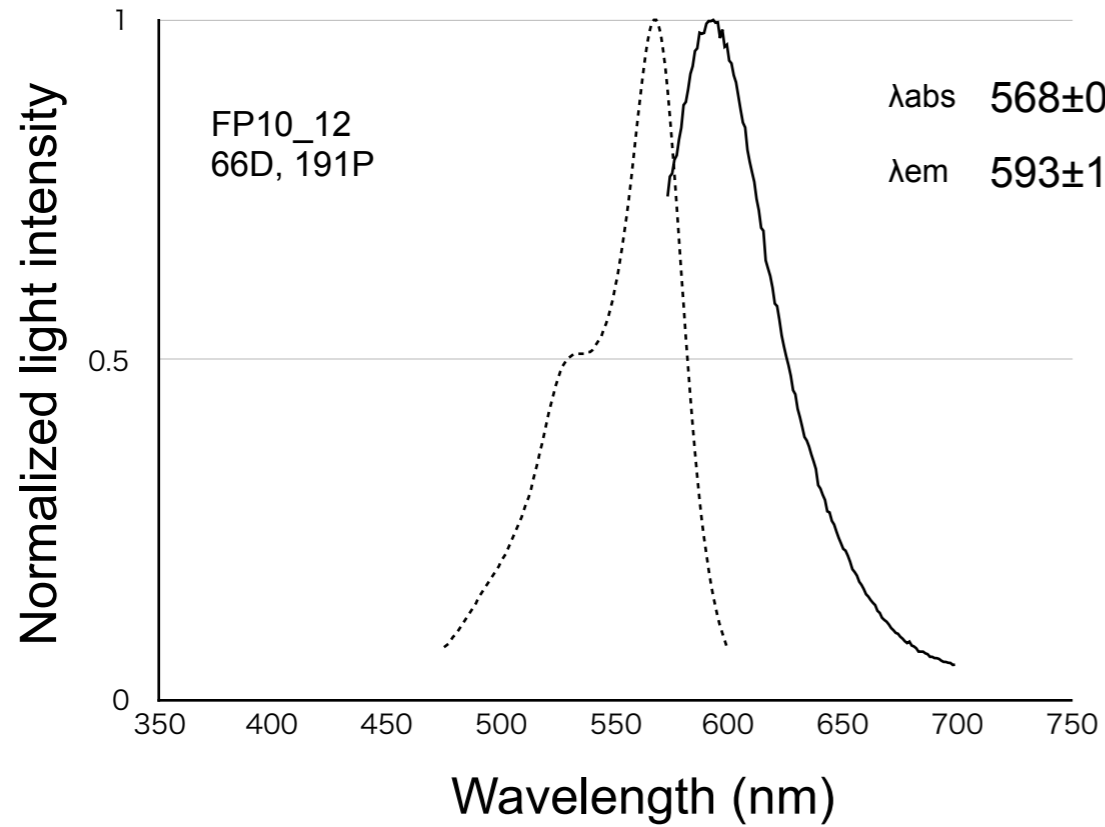

(D)

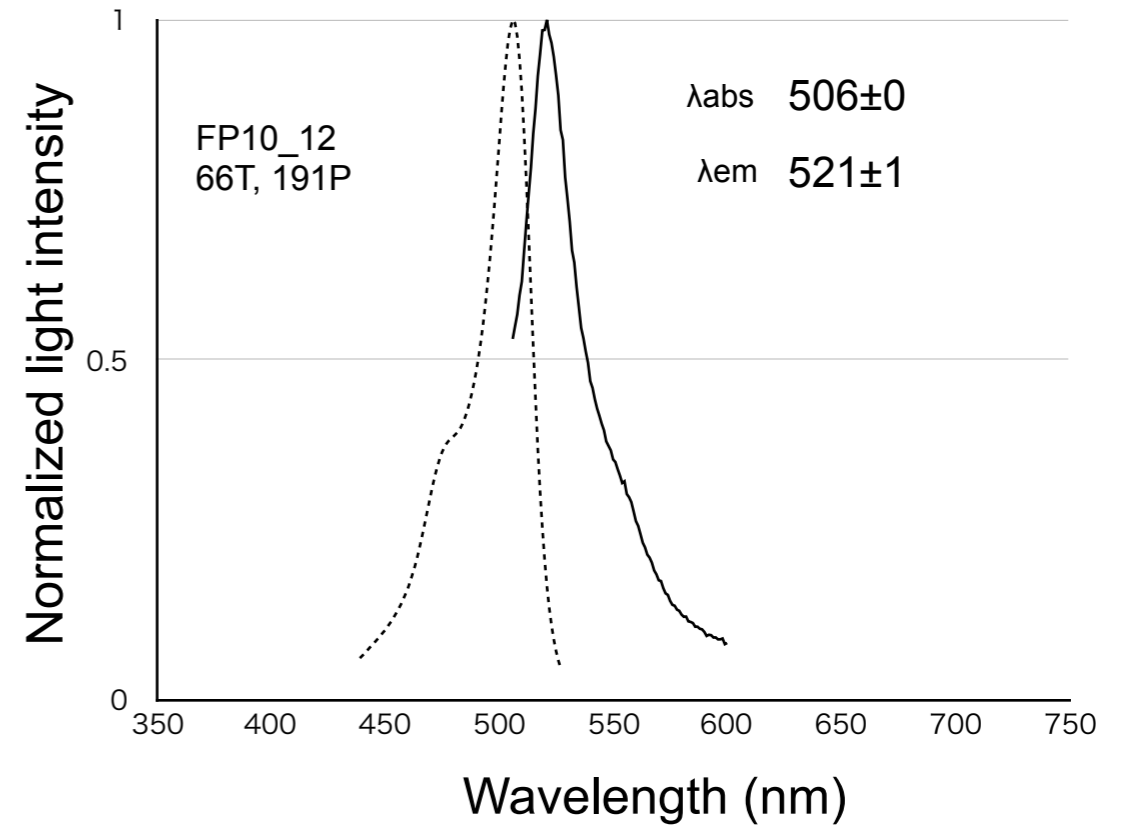

# Supporting Fig. S7

(A)

S/MWE

scaffold 84

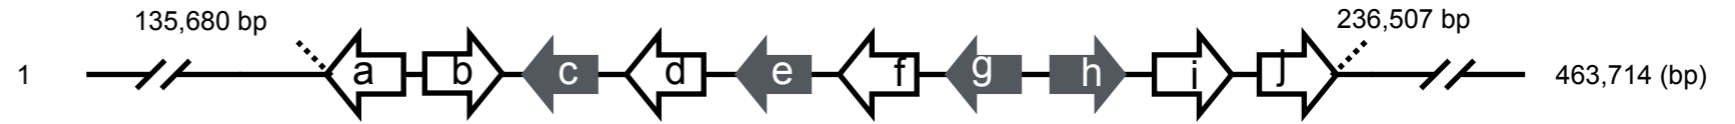

scaffold 466

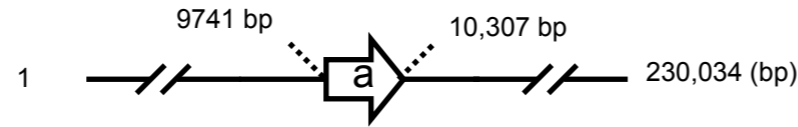

scaffold 2562

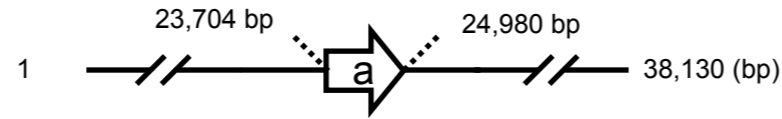

(B)

M/LWE

scaffold 205

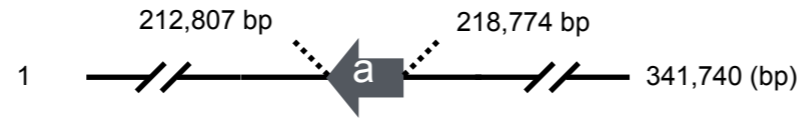

scaffold 605

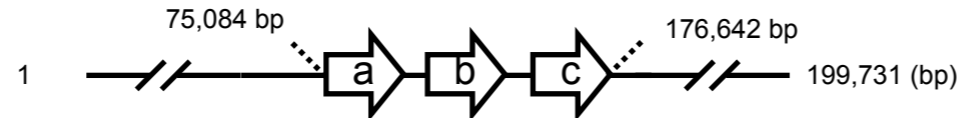

scaffold 2023

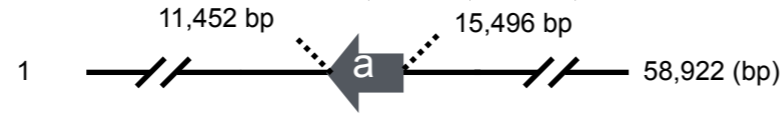

(C)

CP

scaffold 75

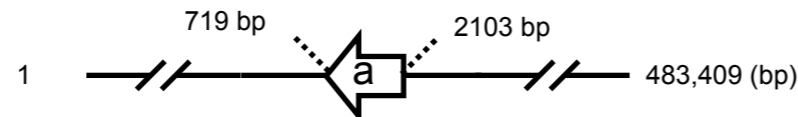

scaffold 528

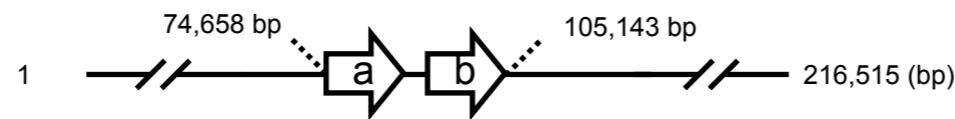

scaffold 947

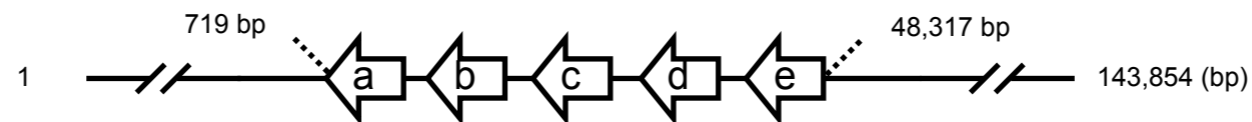

# Supporting Fig. S7

## (D) S/MWE

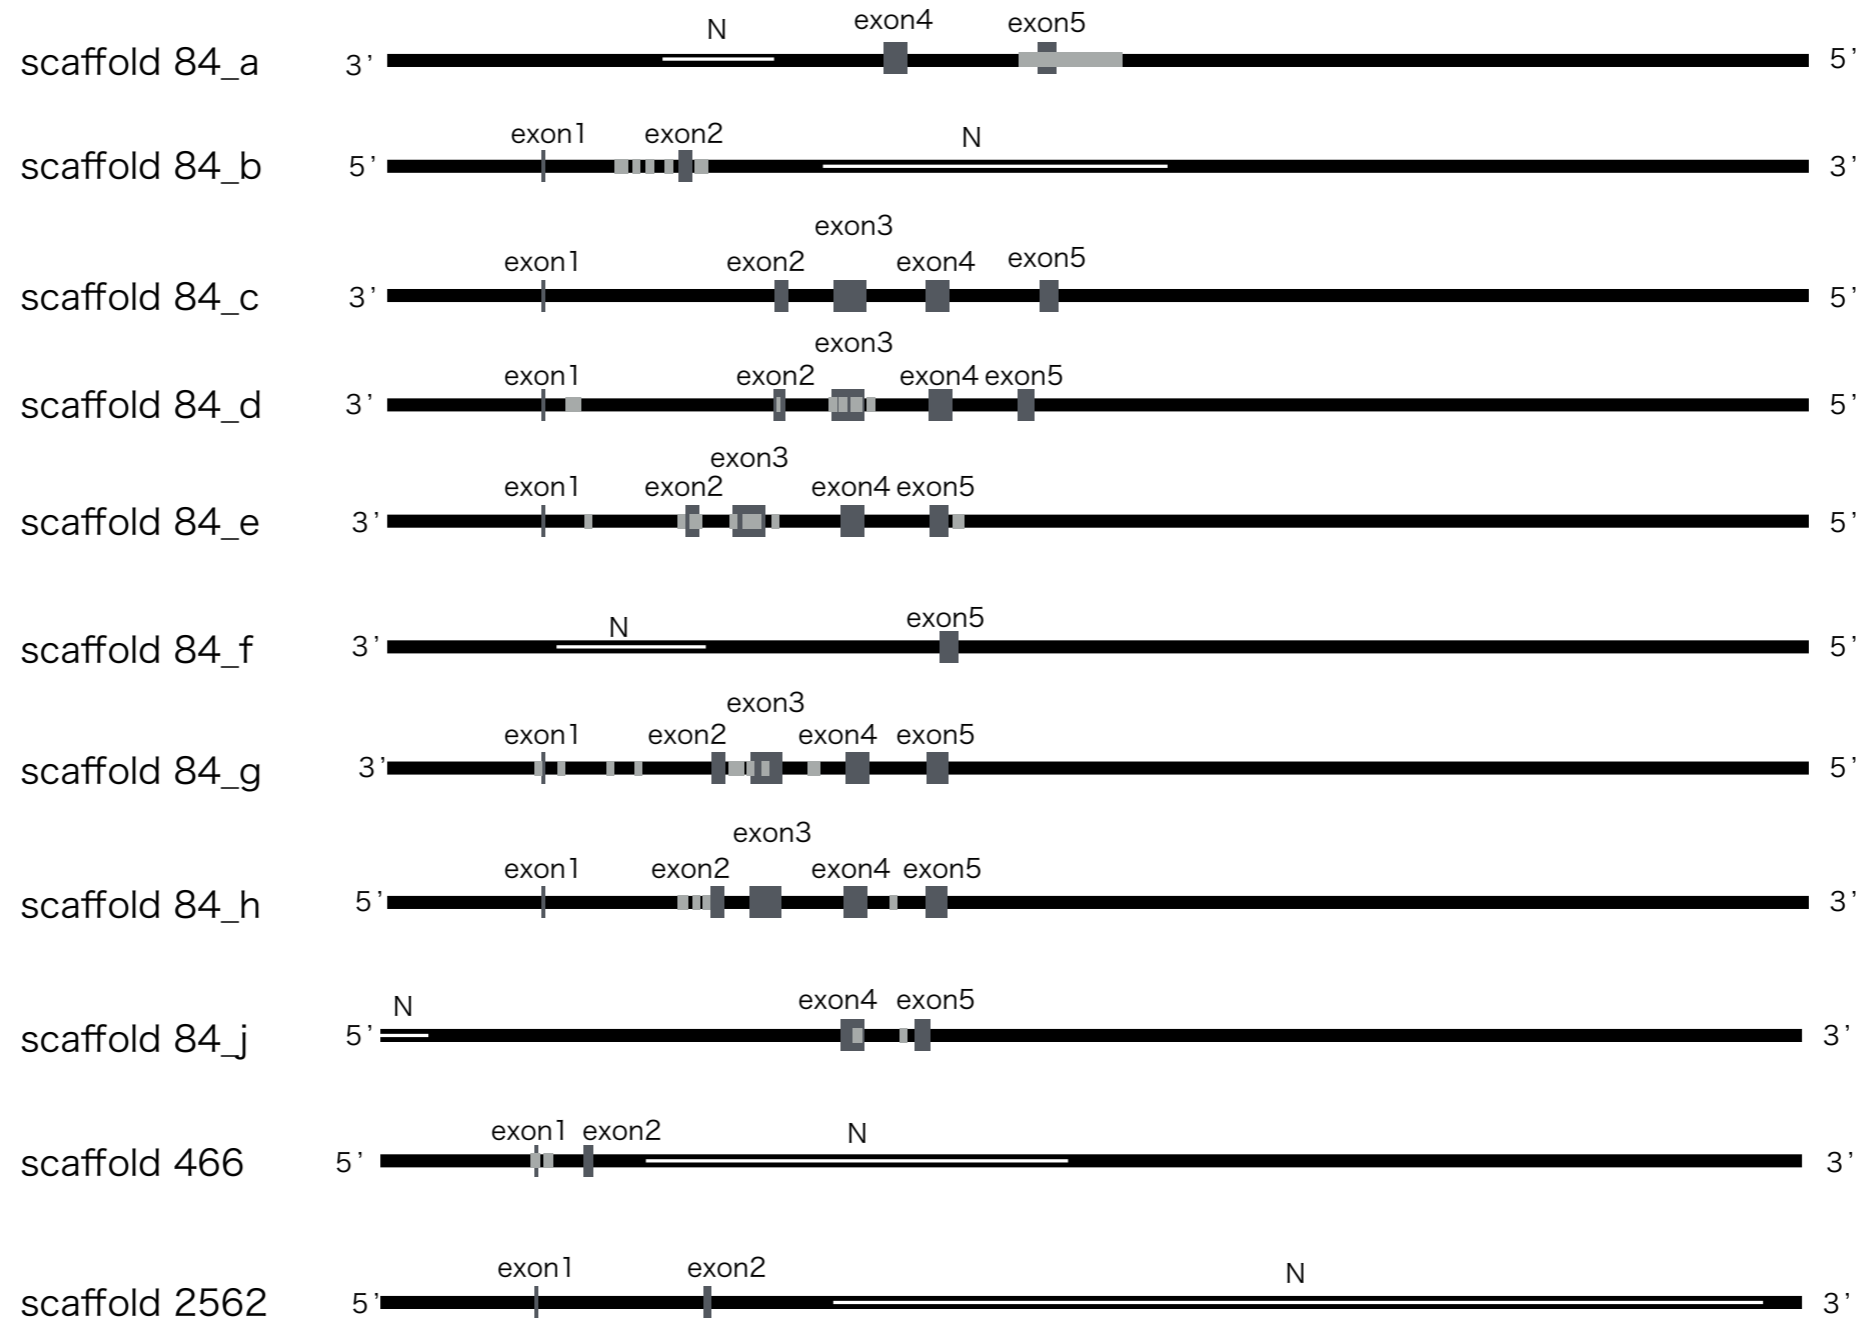

# Supporting Fig. S7 continued

## (E) M/LWE

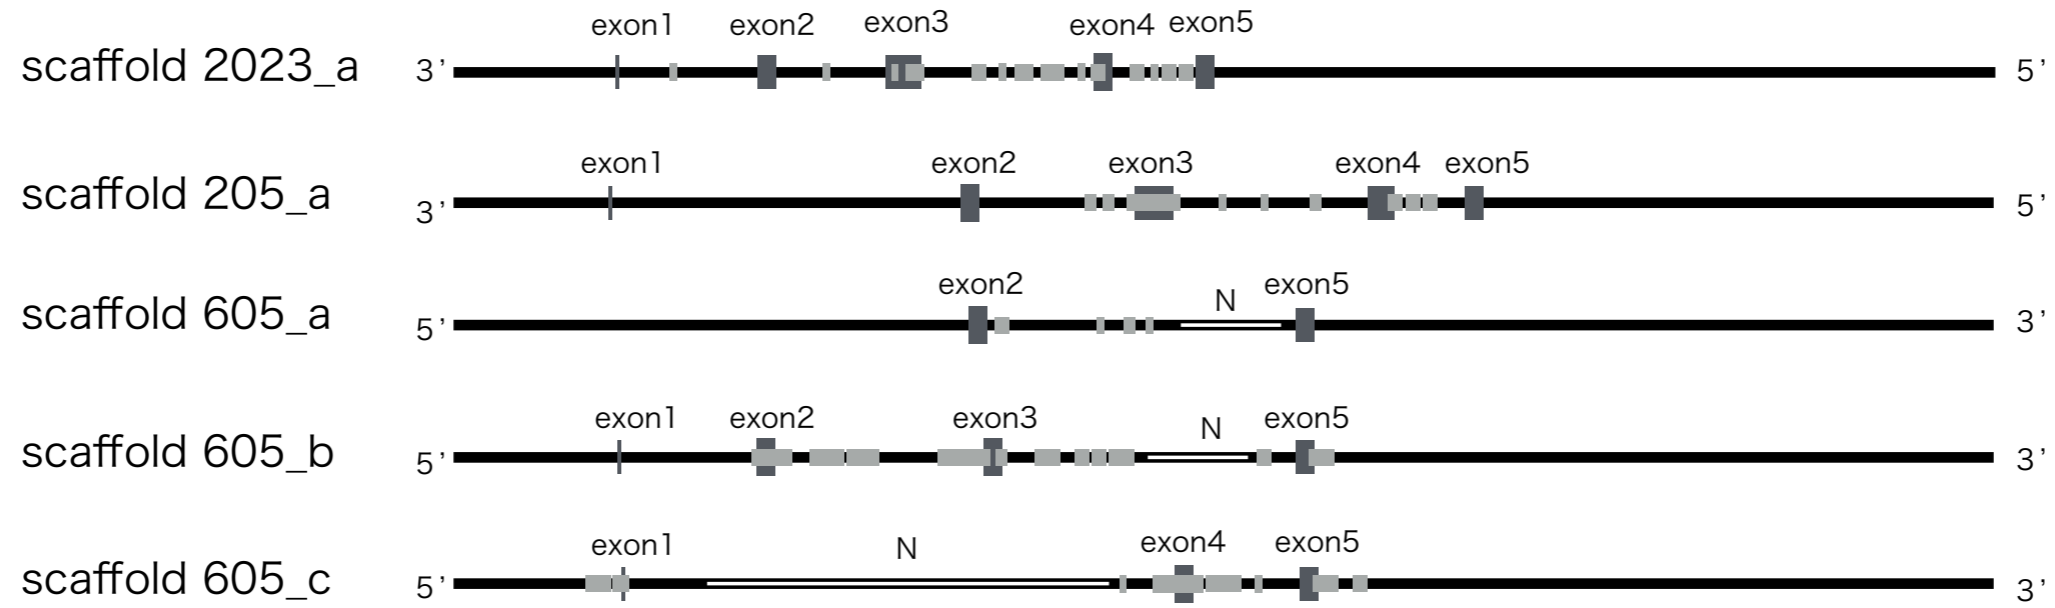

# Supporting Fig. S7 continued

## (F) CP

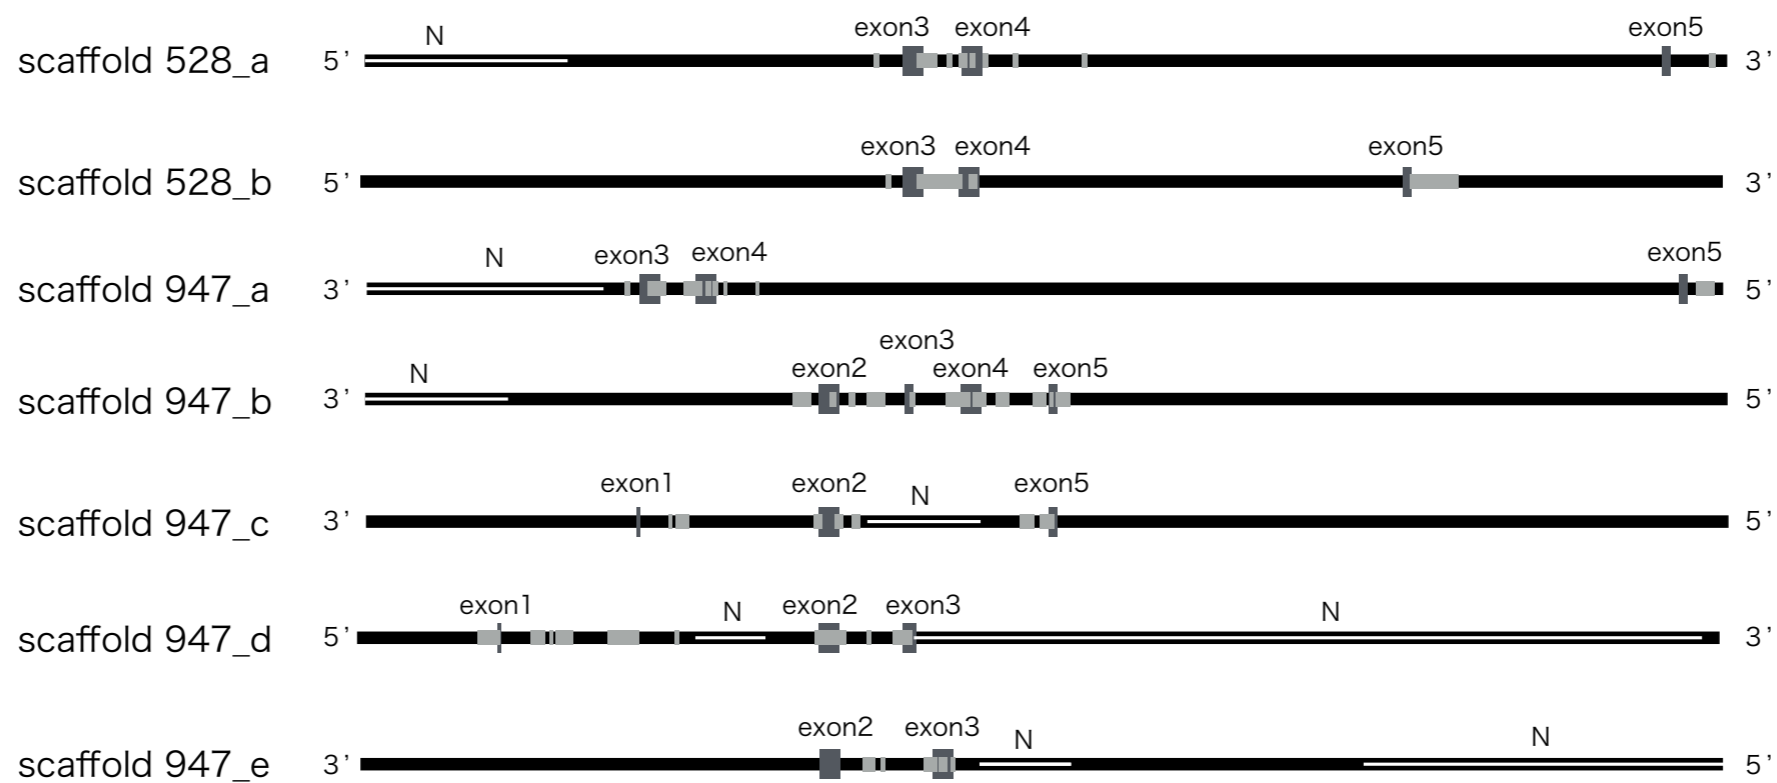



Supporting Fig. S8 continued

(B)

M/LWE

1 1 1 1 1 1 1 1 1 2 3 4 5 5 5 6 6 6 6 6  
 8 9 1 1 2 2 2 4 4 5 6 6 5 7 2 3 9 1 1 2 4 5  
 4 0 1 4 0 3 9 1 7 3 5 7 1 7 5 4 1 2 8 1 2 1

*A. digitifera*  
 M/LWE\_Consensus  
 FP10\_12  
 FP10\_BH\_16  
 FP10\_BH2\_11  
 FP10\_BH2\_4  
 FP10\_BH2\_5  
 FP10\_BH2\_7  
 FP10\_Dl1\_4  
 FP10\_Dl1\_7  
 FP10\_Dl1\_8

*A. tenuis*  
 AdiFP10KX\_Tl\_1  
 AdiFP10KX\_Tl\_2  
 AdiFP10KX\_Tl\_3  
 AdiFP10KX\_Tl\_6  
 AdiFP10KX\_Tl\_8  
 AdiFP10KX\_Tl\_9  
 AdiFP10KX\_Tl\_12  
 AdiFP10KX\_Tl\_13  
 AdiFP10KX\_Tl\_15  
 AdiFP10KX\_Tl\_16

|   |   |   |   |   |   |   |   |   |   |   |   |   |   |   |   |   |   |   |   |   |   |
|---|---|---|---|---|---|---|---|---|---|---|---|---|---|---|---|---|---|---|---|---|---|
| G | G | T | C | G | A | T | T | T | G | A | T | G | G | T | C | G | G | C | G | G | A |
| . | . | . | . | . | . | . | . | . | . | T | . | . | . | . | . | . | . | . | . | . | . |
| . | . | . | . | . | . | . | . | . | . | . | . | . | . | . | . | A | . | . | . | . | A |
| . | . | . | . | . | . | . | . | . | . | . | . | . | . | . | . | . | . | . | . | . | . |
| . | A | . | T | . | . | . | . | C | . | . | . | . | . | G | . | A | . | . | . | A | . |
| . | . | . | . | . | . | . | . | . | A | . | . | . | . | . | T | . | . | . | . | . | . |
| . | . | . | T | . | . | . | . | C | . | . | . | . | . | G | . | . | . | . | . | . | G |
| T | . | . | . | . | . | C | . | . | A | . | . | . | A | . | . | A | . | . | . | . | G |
| . | . | . | . | . | . | . | . | . | . | . | . | A | . | . | . | . | . | . | . | . | G |
| C | . | C | . | A | . | . | C | . | . | . | A | A | . | . | . | . | G | T | . | . | . |
| C | . | . | . | G | . | C | . | . | . | C | . | . | . | . | . | A | . | T | . | . | . |
| . | . | . | A | . | . | C | . | . | . | C | . | . | . | . | A | . | T | . | . | . | . |
| . | . | T | . | G | . | C | . | . | . | C | A | . | . | . | . | G | T | . | . | . | . |
| C | C | . | . | G | . | C | . | . | . | A | A | . | . | . | . | G | T | . | . | . | . |
| C | . | . | . | . | . | C | . | . | . | C | A | . | . | . | . | G | T | . | . | . | . |
| T | . | . | . | . | . | . | . | . | . | C | . | . | . | . | . | . | . | . | . | . | . |
| . | . | T | . | G | . | C | . | . | . | C | . | . | . | . | . | G | T | . | . | . | . |
| . | . | T | . | G | . | C | . | . | . | C | A | . | . | . | . | G | T | . | . | . | . |
| C | C | . | . | G | . | C | . | . | . | A | A | . | . | . | . | G | T | . | . | . | . |





# Supporting Fig. S9

(A) *A. digitifera*: MWE1

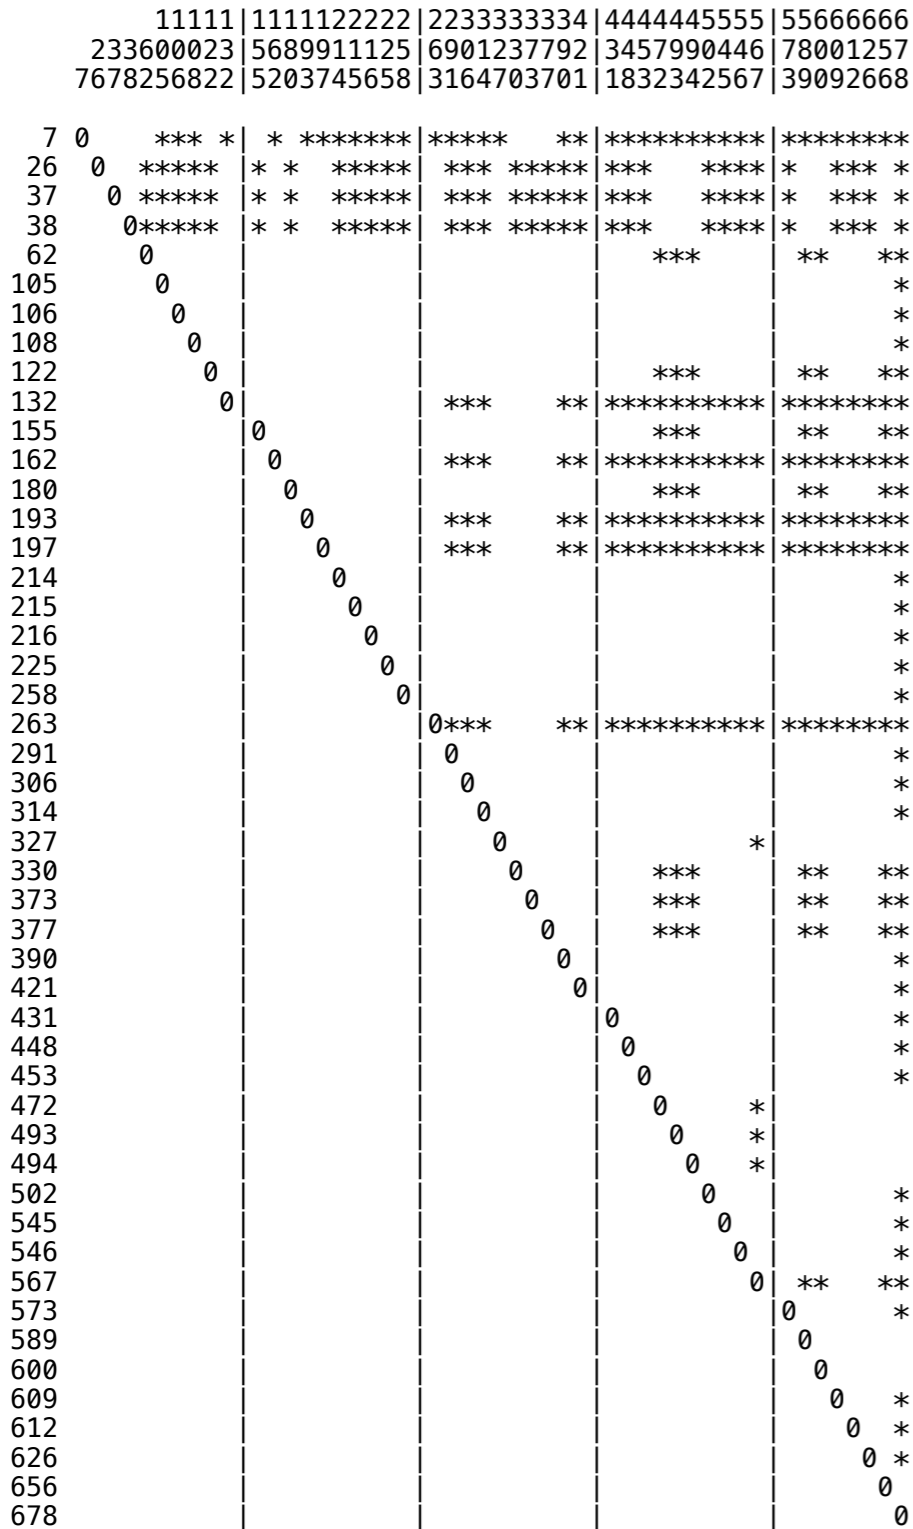

# of nontrivial sites = 48

(B) *A. digitifera*: M/LWE

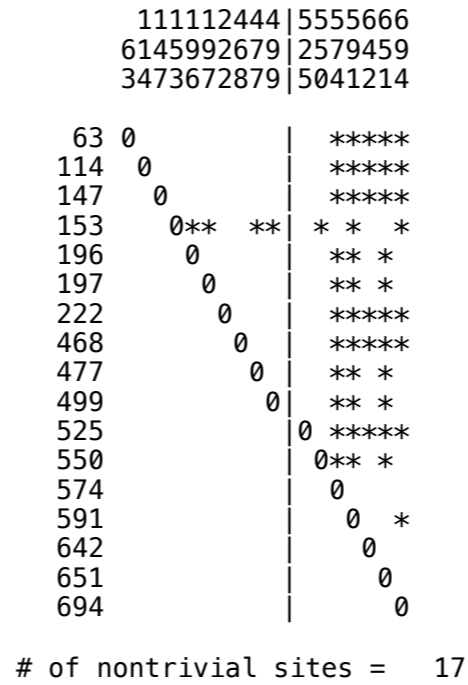

(C) *A. digitifera*: CP

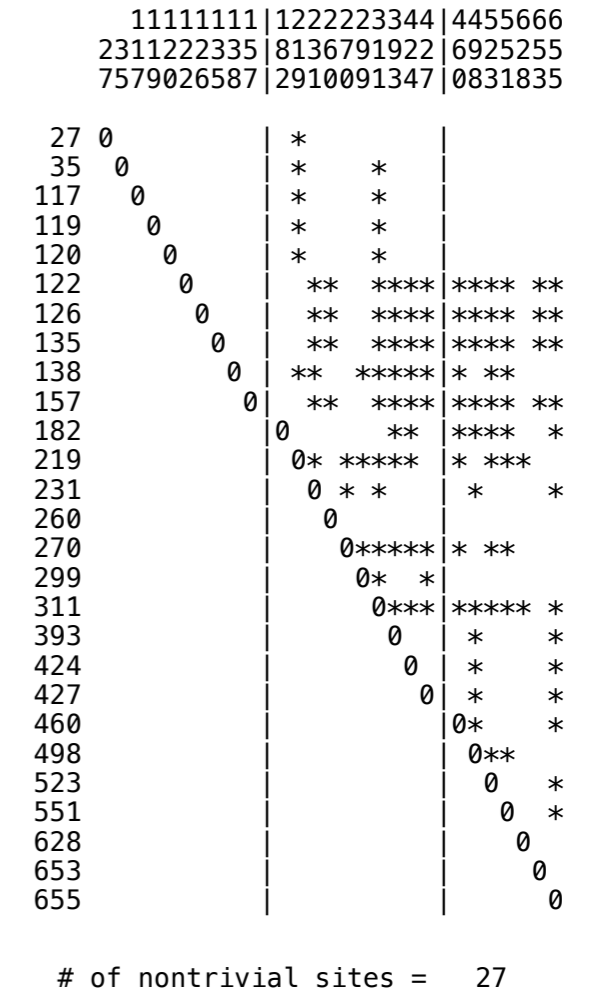

# Supporting Fig. S9 continued

(D) *A.tenuis*: MWE1

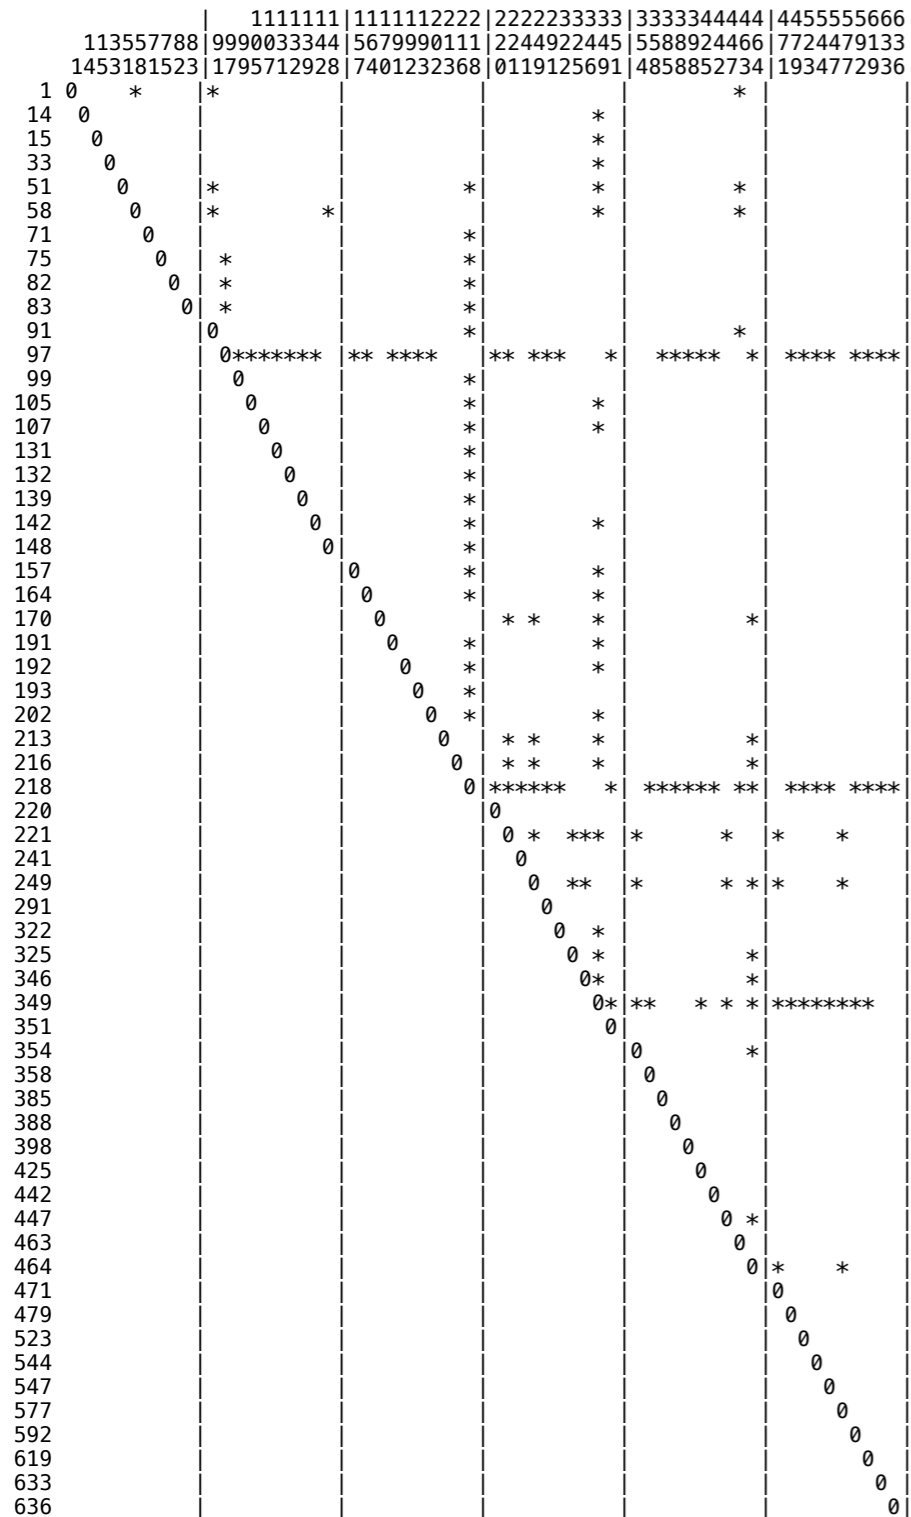

# of nontrivial sites = 60

(E) *A.tenuis*: M/LWE

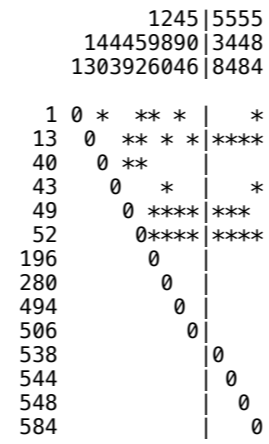

# of nontrivial sites = 14

(F) *A.tenuis*: CP

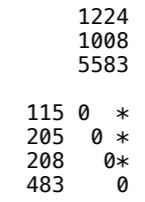

# of nontrivial sites = 4

# Supporting Table S1.

## Table S1

| Sample name | Species              | Life stage | Experiment                                           |
|-------------|----------------------|------------|------------------------------------------------------|
| SESOKO#B1   | <i>A. digitifera</i> | adult      | fluorescence measurements                            |
| SESOKO#B2   | <i>A. digitifera</i> | adult      | fluorescence measurements                            |
| SESOKO#3    | <i>A. digitifera</i> | adult      | fluorescence measurements                            |
| SESOKO#4    | <i>A. digitifera</i> | adult      | fluorescence measurements                            |
| SESOKO#7    | <i>A. digitifera</i> | adult      | fluorescence measurements                            |
| Adigi1      | <i>A. digitifera</i> | adult      | RNA-seq analysis and FP sequence isolation from cDNA |
| Adigi2      | <i>A. digitifera</i> | adult      | FP gene copy number estimation from genomic DNA      |
| Adigi3      | <i>A. digitifera</i> | adult      | FP gene copy number estimation from genomic DNA      |
| Adigi4      | <i>A. digitifera</i> | adult      | FP gene copy number estimation from genomic DNA      |
| Adigi5      | <i>A. digitifera</i> | adult      | FP gene copy number estimation from genomic DNA      |
| S1603       | <i>A. digitifera</i> | adult      | FP sequence isolation from cDNA                      |
| D11         | <i>A. digitifera</i> | larva      | FP sequence isolation from cDNA                      |
| DI          | <i>A. digitifera</i> | larvae     | RNA-seq analysis                                     |
| Ta          | <i>A. tenuis</i>     | adult      | RNA-seq analysis and FP sequence isolation from cDNA |
| TI          | <i>A. tenuis</i>     | larvae     | RNA-seq analysis and FP sequence isolation from cDNA |

**Table S2**

| Total number of reads       | Mapped sequence | Length | Average coverage |
|-----------------------------|-----------------|--------|------------------|
| <i>A. digitifera</i> larvae | <i>AdiFP10L</i> | 699    | 93973            |
| 80,164,640                  | <i>AdiFP8L</i>  | 666    | 397662           |
|                             | <i>AdiFP2</i>   | 696    | 18032            |
| <i>A. digitifera</i> adult  | <i>AdiFP10L</i> | 699    | 37               |
| 94,059,356                  | <i>AdiFP8L</i>  | 666    | 194              |
|                             | <i>AdiFP2</i>   | 696    | 37               |
| <i>A. tenuis</i> larvae     | <i>AdiFP10L</i> | 699    | 50167            |
| 84,018,960                  | <i>AdiFP8L</i>  | 666    | 313              |
|                             | <i>AdiFP2</i>   | 696    | 50805            |
| <i>A. tenuis</i> adult      | <i>AdiFP10L</i> | 699    | 113              |
| 88,821,670                  | <i>AdiFP8L</i>  | 666    | 1071             |
|                             | <i>AdiFP2</i>   | 696    | 203              |
